# Supplementary material
Source: PubMed Central journal article supplement (PMC7606832)
Supplement: NIHMS1634781-supplement-1.pdf [file NIHMS1634781-supplement-1.pdf]

## Supplemental data

Supplemental Fig. 1, Experimental design for both Experiment 1 and Experiment 2. Male and female control and diabetic animals were studied in Experiment 1, male sham and ME animals were used in Experiment 2.

Supplemental Fig. 2, Higher magnification images in cortex and striatum for histopathological studies. Increased vacuolation and neuronal injury (arrow), expanded PVS (dash line) can be seen in diabetic animals with HE staining (A), while LFB staining (B) showed demyelination and increased inflammatory cells in diabetic animals. Ctrl: control, DM: diabetes, cc: corpus callosum.
