# Supplementary material
Source: PubMed Central journal article supplement (PMC7606832)

Supplemental Fig. 1

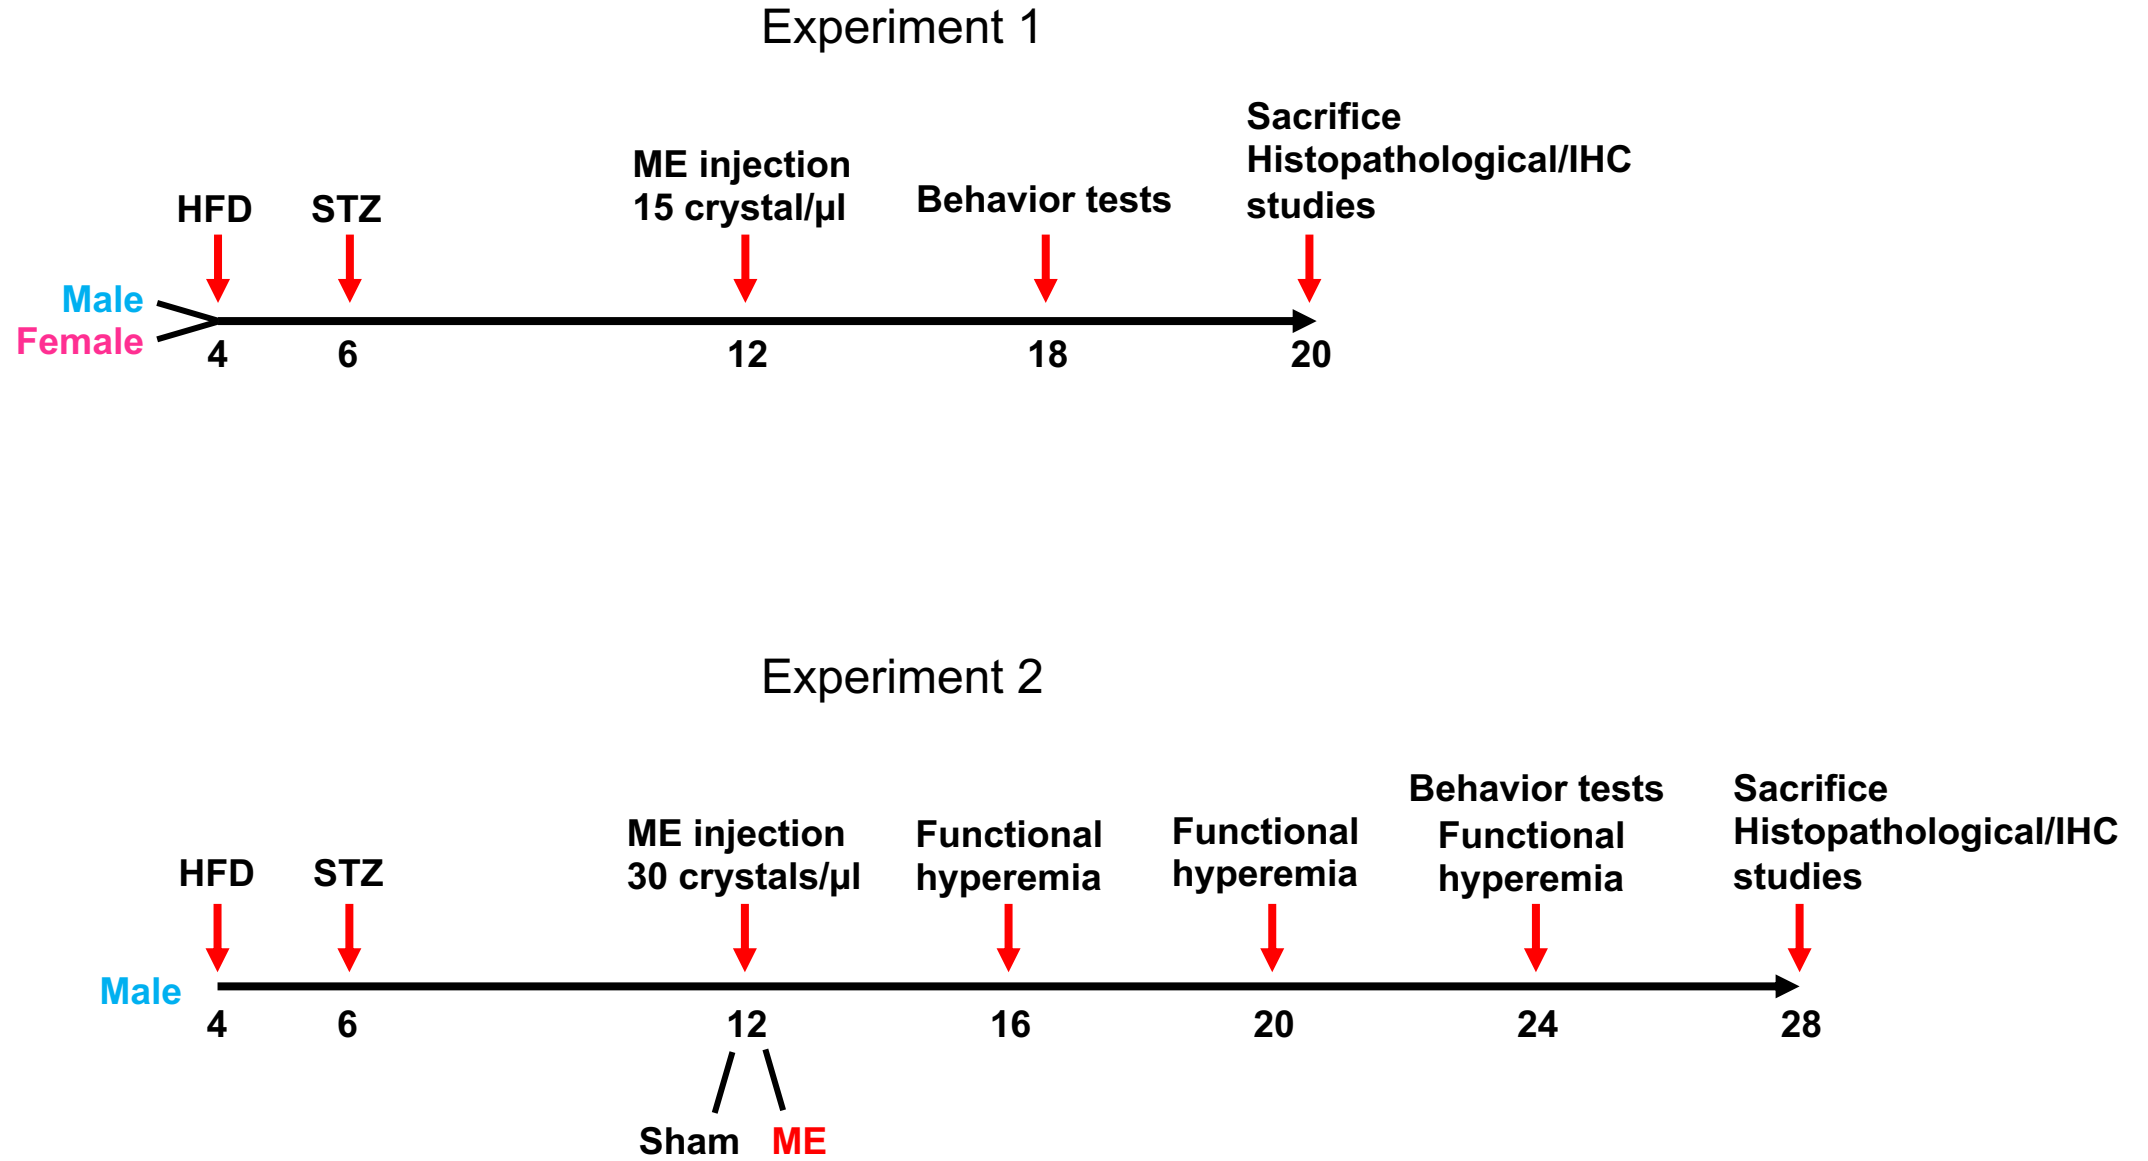

Supplemental Fig. 2

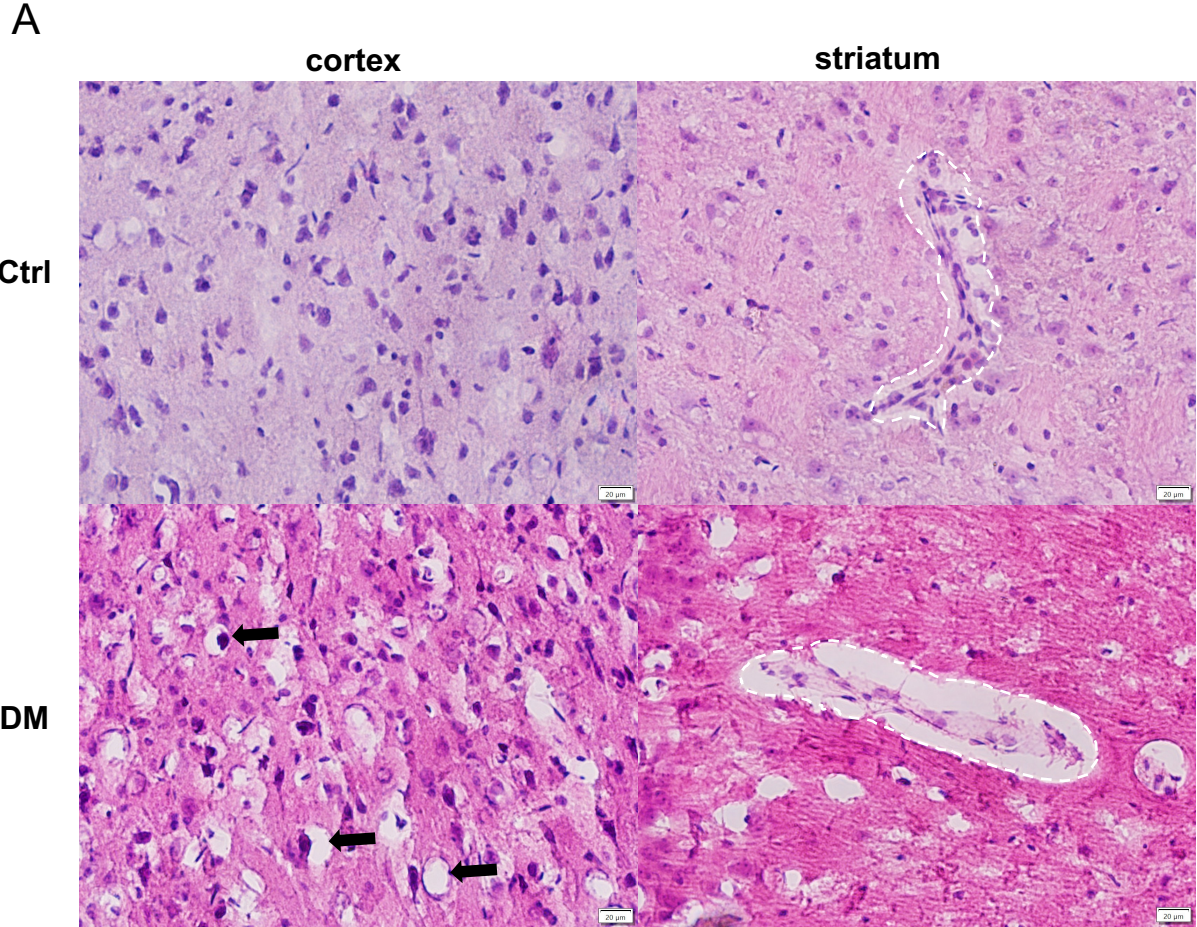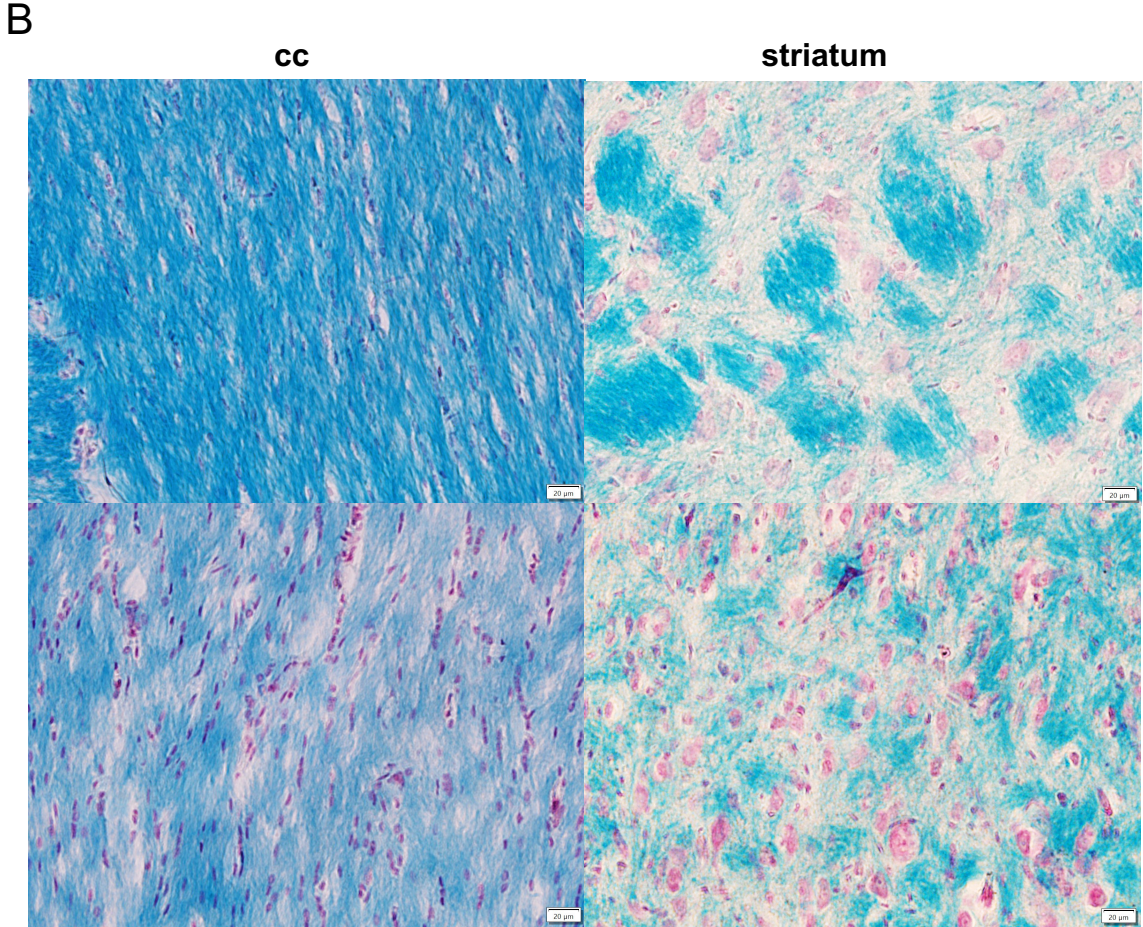

Supplement: NIHMS1634781-supplement-2.pdf [file NIHMS1634781-supplement-2.pdf]
